# Supplementary material for: Modeling of Transient Trapping of Fatty Acid Tails in Phospholipids
Source: Royal Society of Chemistry journal article supplement (doi:10.1039/c9sm02111f), 2019-04-23
Supplement: c9sm02111f1.pdf [file c9sm02111f1.pdf]

# Modeling the Dynamics of Phospholipids in the Fluid Phase of Liposomes

Sudipta Gupta,\*<sup>a</sup> and Gerald J. Schneider\*<sup>a,b</sup>

<sup>a</sup>*Department of Chemistry, Louisiana State University, Baton Rouge, LA 70803, USA*

<sup>b</sup>*Department of Physics & Astronomy, Louisiana State University, Baton Rouge, LA 70803,  
USA*

## ELECTRONIC SUPPLEMENTARY INFORMATION

### Neutron Spin Echo Spectroscopy Basics

Neutron Spin Echo (NSE) spectroscopy detects the sum of coherent and incoherent scattering.

Typically, the coherent part dominates which leads to<sup>S1</sup>

$$\frac{S(Q, t)}{S(Q)} = \frac{\sigma_{coh}S(Q, t)_{coh} - (1/3)\sigma_{inc}S(Q, t)_{inc}}{\sigma_{coh}S(Q)_{coh} - (1/3)\sigma_{inc}S(Q)_{inc}} \approx \frac{S(Q, t)_{coh}}{S(Q)_{coh}} \quad (S1)$$

where  $\sigma_{coh}$  and  $\sigma_{inc}$  are the coherent and incoherent scattering cross-sections, respectively. The coherent and the incoherent intermediate scattering functions are represented by  $S(Q, t)_{coh}$  and  $S(Q, t)_{inc}$ , respectively.

The time dependent mean-squared displacement of randomly diffusing, infinitely small and massless particles can be written as  $\langle (r_i(0) - r_i(t))^2 \rangle = 6 D t$ .<sup>S2</sup> Assuming validity of the Gaussian approximation in the calculation of the time dependent incoherent dynamic structure factor,  $S(Q, t)_{inc}^{tr}$ , we arrive at the well-known expression<sup>S2</sup>

$$S(Q, t)_{inc}^{tr} = N \exp(-Q^2 D_{eff} t) \quad (S2)$$

Equation S2 implicitly includes  $N$  particles randomly diffusion independently of each other.

In a next step, we exploit the fact that the pair-correlation function can be separated into inter- and intermolecular contributions. In case of dilute solutions which implies uncorrelated motion, the intermolecular contributions can be neglected.<sup>S1,S2</sup> Since we assume non-interacting, infinitely small and massless particles the intramolecular interactions can be ignored.<sup>S1,S2</sup>. In this or in the

more general case, of objects with finite dimensions, center of mass diffusion and a separation ansatz, e.g., to separate rotational motion, can be utilized to derive the coherent dynamic structure factor,  $S(Q, t)_{\text{coh}}^{\text{tr}}$ ,

$$S(Q, t)_{\text{coh}}^{\text{tr}} \propto N \exp(-Q^2 D_{\text{eff}} t) \quad (\text{S3})$$

Eqs. S2 and S3 illustrate the more general principle that the coherent dynamic structure factor contains pair- and self-correlation contributions. In those cases, when objects move independently the self-correlation part in  $S(Q, t)_{\text{coh}}$  has the same form as in the respective part in  $S(Q, t)_{\text{inc}}$ .

### Different Illustrations of the Results

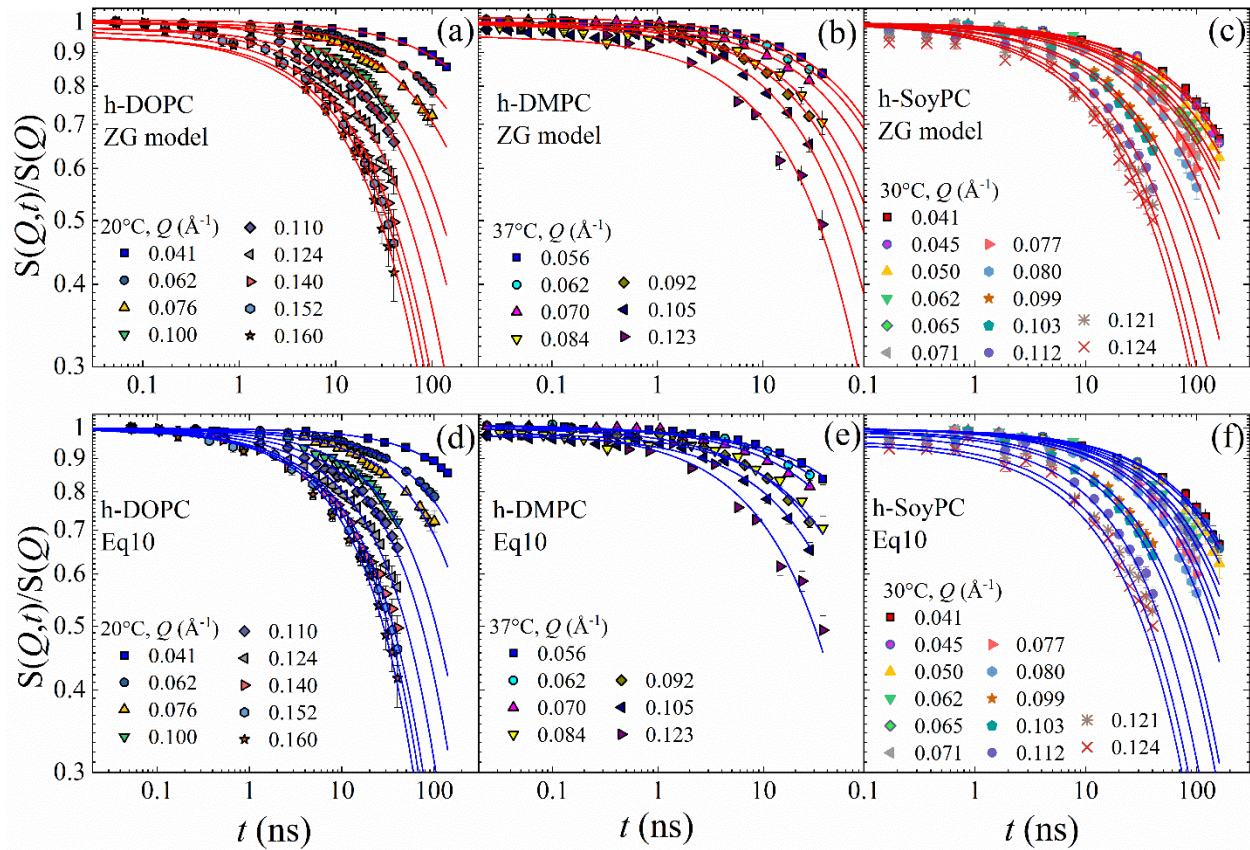

Figure S1: Log-log representations of the normalized intermediate scattering function,  $S(Q, t)/S(Q)$ , as a function of Fourier time,  $t$ , for different  $Q$ 's, for, (a,d) 5% lipid mass fraction of protonated DOPC at 20°C, (b,e) 5% lipid mass fraction of protonated DMPC at 37°C and (c,f) the 5% lipid mass fraction of protonated Soy-PC sample at 30°C, all in  $D_2O$ . The same data sets are analyzed by fits using the (a-c) Zilman-Granek model (ZG) (equation 5) and (d-f) the full model that starts from equation 3 and includes diffusion of liposomes and confined motion of lipid tails (equation 10). The error bars representing one standard deviation.

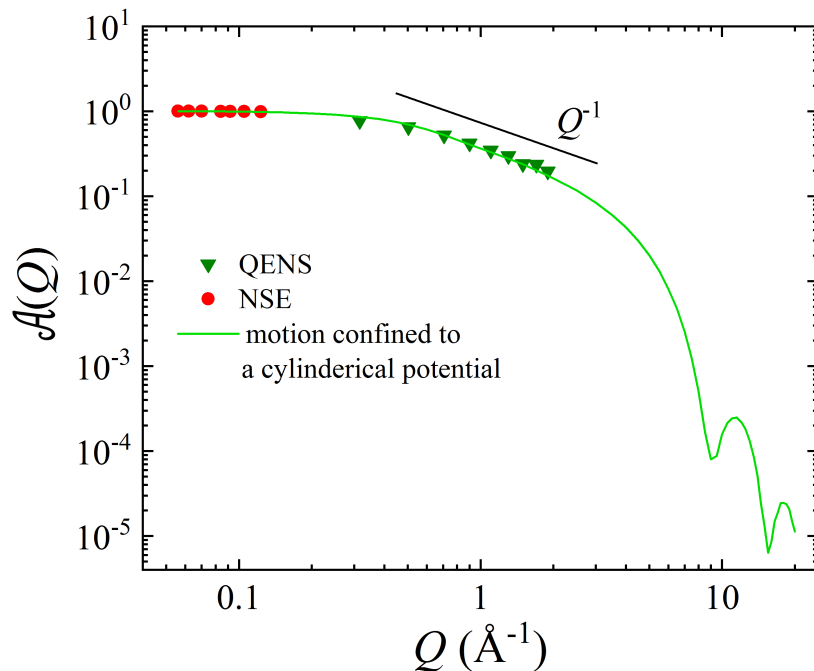

Figure S2: The  $\mathcal{A}(Q)$  for *h*-DMPC obtained from NSE and QENS studies, over a broad  $Q$ -range. The data is modelled using  $\mathcal{A}(Q)$  for a particle diffusion in a cylinder.

### References:

- S1. D. Richter, M. Monkenbusch, A. Arbe and J. Colmenero, *Adv Polym Sci*, 2005, **174**, 1 - 221.
- S2. J. S. Higgins and H. C. Benoit, *Polymers and Neutron Scattering*, Clarendon Press, Oxford New York, 1996.
- S3. R. Zorn, *Physical Review B*, 1997, 55, 6249-6259.
- S4. G. J. Schneider, K. Nusser, S. Neueder, M. Brodeck, L. Willner, B. Farago, O. Holderer, W. J. Briels and D. Richter, *Soft Matter*, 2013, 9, 4336.
- S5. C. Gerstl, G. J. Schneider, A. Fuxman, M. Zamponi, B. Frick, T. Seydel, M. Koza, A. C. Genix, J. Allgaier, D. Richter, J. Colmenero and A. Arbe, *Macromolecules*, 2012, 45, 4394-4405.
